# Supplementary material for: Cannabinoids for behavioral symptoms in severe dementia: Safety and feasibility in a long-term pilot observational study in nineteen patients
Source: PubMed Central journal article supplement (PMC9557769; doi:10.3389/fnagi.2022.957665), 2022-09-29
Supplement: Data_Sheet_1.pdf [file Data_Sheet_1.pdf]

Supplementary material

Supplement A

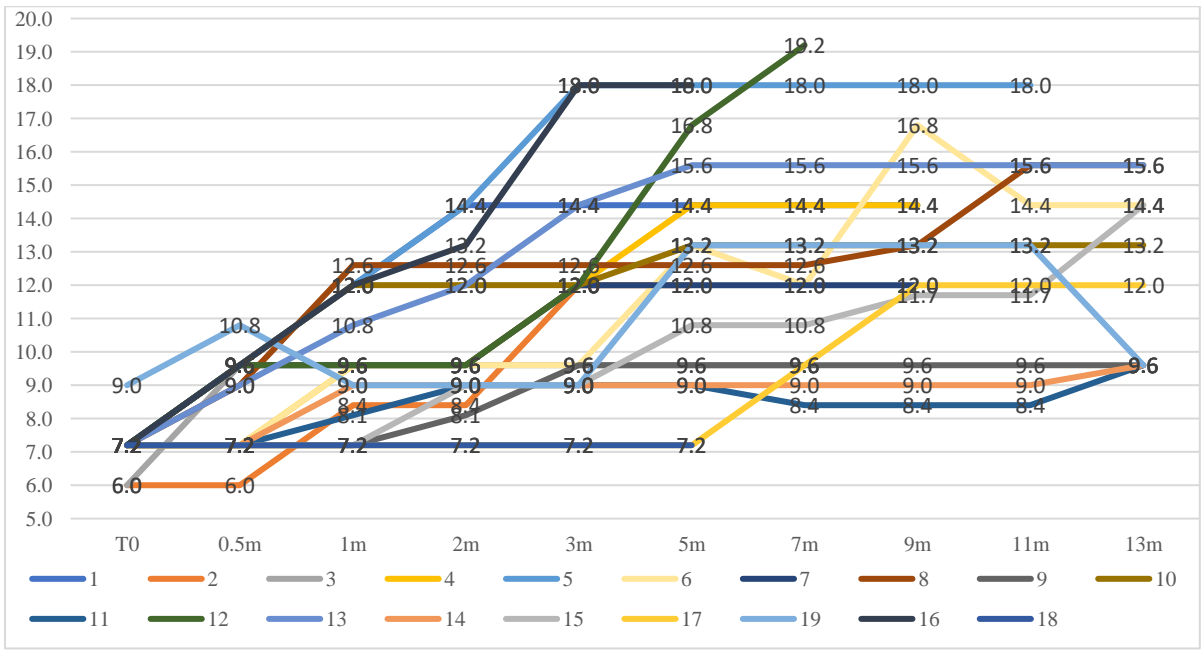

Figure A1: per-patient THC mg dosage evolution at time of assessments. m=month of assessment

**Table A.1 – Adverse events**

| <b>Adverse event<br/>(MedDRA System Organ Class)</b>                           | <b>Number of<br/>events</b> | <b>Relatedness</b>                                   | <b>Assessment of severity</b> |
|--------------------------------------------------------------------------------|-----------------------------|------------------------------------------------------|-------------------------------|
| Blood and lymphatic system disorders                                           | 1                           | Not related                                          | Moderate                      |
| Ear and labyrinth disorders                                                    | 1                           | Not related                                          | Mild                          |
| Endocrine disorders                                                            | 1                           | Not related                                          | Moderate                      |
| Eye disorders <sup>a</sup>                                                     | 9                           | 1 Definitely-1 Probable<br>6 Not related             | 7 Mild/1Moderate<br>1 Severe  |
| Gastrointestinal disorders                                                     | 26                          | 1 Possibly-2 Unlikely<br>23 Not related              | 14 Mild /12 Moderate          |
| General disorders <sup>b</sup> and administration site conditions <sup>c</sup> | 12                          | 3 Definitely-3 Probable<br>4 Possible -2 Not related | 9Mild/2Moderate/1 Death       |
| Infections and infestations                                                    | 17                          | 17 Not related                                       | 6Mild/11Moderate              |
| Metabolism and nutrition disorders                                             | 9                           | 1 Definitely-1 Probable<br>7 Not related             | 8Mild/1Moderate               |
| Musculoskeletal and connective tissue disorders                                | 6                           | 6 Not related                                        | 5Mild/1Moderate               |
| Neoplasms benign, malignant, and unspecified<br>(including cysts and polyps)   | 2                           | 2 Not related                                        | 1 Mild/1 Moderate             |
| Nervous system disorders                                                       | 14                          | 1 Definitely-2 Possible<br>11 Not related            | 11Mild/3 Moderate             |
| Psychiatric disorders                                                          | 1                           | Unlikely                                             | Moderate                      |
| Renal and urinary disorders                                                    | 1                           | Not related                                          | Mild                          |
| Respiratory, thoracic, and mediastinal disorders                               | 6                           | 2 Unlikely-4 Not related                             | 1 Mild/5Moderate              |
| Skin and subcutaneous tissue disorders                                         | 6                           | 1 Probable -5 Not related                            | 6 Mild                        |
| Vascular disorders                                                             | 5                           | 1Unlikely-4 Not related                              | 4Mild/1Severe                 |

a. Eye disorders were recorded for three patients: one had mild red eyes, one experimented eyelid hematoma and tearing eyes in the month before dying, one suffered from entropion and needed surgery

b. General disorder : Death (not related)

c. Administration site disorders : mouth pain, mouth ulcers, and gingivitis - were resolved when the treatment was changed from the alcoholic tincture to the oil formulation and never occurred after.

**Table A.2****Deprescribed drugs and time at deprescription since first cannabinoids intake**

| <b>Study Id</b> | <b>ATC treatment - deprescription</b> | <b>Time</b> |
|-----------------|---------------------------------------|-------------|
| 2               | risperidone                           | 10 weeks    |
| 3               | quetiapine                            | 2 weeks     |
| 4               | quetiapine                            | 3 weeks     |
| 5               | celecoxib                             | 12 weeks    |
| 6               | haloperidol                           | 64 weeks    |
| 7               | morphine                              | 8 weeks     |
| 8               | morphine                              | 16 weeks    |
| 9               | diclofenac                            | 48 weeks    |
| 10              | levodopa and decarboxylase inhibitor  | 2 weeks     |
|                 | haloperidol                           | 15 weeks    |
|                 | morphine                              | 48 weeks    |
|                 | morphine*                             | 3 weeks     |
| 12              | pregabalin                            | 15 weeks    |
| 13              | pregabalin                            | 4 weeks     |
| 14              | trazodone                             | 5 weeks     |
| 16              | trazodone                             | 22 weeks    |
| 17              | quetiapine                            | 76 weeks    |
| 18              | escitalopram                          | 26 weeks    |
| 19              | haloperidol                           | 17 weeks    |
|                 | levomepromazine                       | 17 weeks    |
|                 | valproic acid                         | 52 weeks    |
|                 | morphine                              | 11 weeks    |

\*Patient 10 had a double prescription for morphine: 7.5mg + 20 mg

**Table A.3****Additional drugs and time since first cannabinoids intake**

| <b>Study Id</b> | <b>ATC treatment - deprescription</b> | <b>Time</b> |
|-----------------|---------------------------------------|-------------|
| 2               | fentanyl                              | 40 weeks    |
|                 | oxazepam                              | 20 weeks    |
| 9               | morphine                              | 12 weeks    |
| 12              | oxazepam                              | 40 weeks    |
| 16              | melitracen et flupentixol             | 14 weeks    |
| 17              | mirtazapine                           | 38 weeks    |

**Supplement B****Table B.1**  
**Metabolic ratios for CYP 1A2, 2B6, 2C9, 2C19, 2D6, 3A4**

|         | Min | Q1   | Median | Q3   | Max  | Mean | ±SD  |       |
|---------|-----|------|--------|------|------|------|------|-------|
| CYP1A2  | 1st | 0.16 | 0.19   | 0.25 | 0.29 | 0.59 | 0.26 | ±0.11 |
|         | 2nd | 0.12 | 0.15   | 0.17 | 0.22 | 0.46 | 0.20 | ±0.09 |
| CYP2B6  | 1st | 0.80 | 1.53   | 2.11 | 2.99 | 3.99 | 2.26 | ±1.00 |
|         | 2nd | 1.21 | 2.20   | 3.38 | 3.82 | 5.79 | 3.14 | ±1.30 |
| CYP2C9  | 1st | 0.06 | 0.06   | 0.08 | 0.09 | 0.12 | 0.08 | ±0.02 |
|         | 2nd | 0.04 | 0.05   | 0.06 | 0.06 | 0.10 | 0.06 | ±0.02 |
| CYP2C19 | 1st | 0.22 | 0.29   | 0.38 | 0.57 | 1.47 | 0.55 | ±0.38 |
|         | 2nd | 0.10 | 0.25   | 0.34 | 0.43 | 1.91 | 0.44 | ±0.44 |
| CYP2D6  | 1st | 0.02 | 1.00   | 1.61 | 2.62 | 3.41 | 1.72 | ±1.06 |
|         | 2nd | 0.02 | 0.96   | 1.66 | 2.66 | 4.87 | 1.83 | ±1.35 |
| CYP3A4  | 1st | 0.51 | 0.63   | 0.81 | 1.08 | 1.55 | 0.89 | ±0.32 |
|         | 2nd | 0.31 | 0.73   | 0.84 | 1.00 | 1.44 | 0.85 | ±0.27 |

Metabolic ratio= metabolite concentration/substrate concentration

1st= first blood sampling; 2nd= second blood sampling

For full patient results confront Table B.2

**Table B.2**

Per patient metabolic ratios after micro cocktail intake, first (1st) and second (2nd) blood sampling, for CYP 1A2, 2B6, 2C9, 2C19, 2D6, 3A4

| Subj<br>Id | CYP1A2 |      | CYP2B6 |      | CYP2C9 |      | CYP2C19 |      | CYP2D6 |      | CYP3A4 |      |
|------------|--------|------|--------|------|--------|------|---------|------|--------|------|--------|------|
|            | 1st    | 2nd  | 1st    | 2nd  | 1st    | 2nd  | 1st     | 2nd  | 1st    | 2nd  | 1st    | 2nd  |
| 1          | 0.29   | 0.20 | 0.90   | 2.46 | 0.08   | 0.05 | 0.29    | 0.44 | 0.02   | 0.02 | 0.82   | 0.56 |
| 2          | 0.27   | 0.18 | 0.80   | 3.91 | 0.08   | 0.07 | 1.08    | 0.49 | 0.81   | 0.75 | 0.80   | 0.31 |
| 5          | 0.30   | 0.14 | 2.11   | 4.72 | 0.08   | 0.10 | 0.56    | 0.36 | 1.88   | 1.83 | 0.51   | 0.92 |
| 6          | 0.16   | 0.14 | 3.31   | 3.42 | 0.12   | 0.05 | 1.47    | 0.46 | 2.82   | 1.15 | 1.10   | 0.74 |
| 7          | 0.18   | 0.16 | 2.86   | 3.51 | 0.08   | 0.08 | 0.58    | 0.33 | 3.41   | 2.63 | 1.02   | 0.87 |
| 8          | 0.25   | 0.17 | 1.26   | 1.23 | 0.06   | 0.04 | 0.23    | 0.10 | 1.48   | 1.22 | 1.43   | 1.44 |
| 9          | 0.33   | 0.29 | 2.52   | 1.21 | 0.10   | 0.05 | 0.37    | 0.41 | 0.03   | 0.03 | 1.11   | 0.68 |
| 10         | 0.28   | 0.23 | 2.06   | 3.35 | 0.09   | 0.06 | 1.08    | 1.91 | 2.26   | 3.40 | 1.55   | 1.16 |
| 11         | 0.18   | 0.17 | 1.83   | 3.54 | 0.05   | 0.06 | 0.28    | 0.30 | 1.61   | 1.62 | 1.26   | 0.88 |
| 12         | 0.19   | 0.12 | 3.63   | 5.79 | 0.06   | 0.06 | 0.29    | 0.26 | 1.59   | 1.70 | 0.59   | 0.82 |
| 13         | 0.59   | 0.46 | 3.04   | 2.87 | 0.09   | 0.06 | 0.40    | 0.38 | 1.51   | 0.89 | 0.55   | 0.73 |
| 14         | 0.24   | 0.23 | 3.99   | 4.06 | 0.08   | 0.06 | 0.47    | 0.22 | 0.85   | 2.67 | 0.74   | 0.79 |
| 15         | 0.20   | 0.18 | 1.50   | 2.11 | 0.06   | 0.06 | 0.37    | 0.21 | 3.04   | 4.87 | 0.87   | 1.03 |
| 19         | 0.17   | 0.15 | 2.12   | 1.82 | 0.06   | 0.04 | 0.28    | 0.24 | 1.64   | 2.88 | 0.60   | 1.02 |
| 17         | 0.43   | /    | 3.09   | /    | 0.06   | /    | 0.69    | /    | 2.52   | /    | 0.71   | /    |

Reference values for Geneva micro cocktail phenotyping PM=poor metabolizer; EM=normal metabolizer; UM=ultra metabolizer

|    | CYP1A2     | CYP2B6     | CYP2C9 | CYP2C19   | CYP2D6    | CYP3A4    |
|----|------------|------------|--------|-----------|-----------|-----------|
| PM | 0.03-0.204 | 0.062-0.13 | ≤0.03  | 0.08-0.28 | 0.03-0.07 | 0.15-0.29 |
| EM | 0.17-0.39  | 0.81-2.97  | >0.04  | 0.3-1.22  | 0.62-4.3  | 0.32-0.82 |
| UM | 0.42-0.70  | 4.9-12.7   | ≥1.3   | 2.96-7.88 |           | 2.24-5.25 |

**Table B.3 – THC, metabolites, and CBD plasma concentrations**

**THC, 11-OH-THC, THC-COOH and CBD plasma concentration mean values ( $\pm$  SD) and corresponding 24 hours THC or CBD dosages**

| <b>Number of Patients/ Analysis</b>      | <b>THC admin mg/24h</b> | <b>THC <math>\mu</math>g/L Mean (<math>\pm</math>SD)</b> | <b>11-OH-THC <math>\mu</math>g/L Mean (<math>\pm</math>SD)</b> | <b>THC-COOH <math>\mu</math>g/L Mean (<math>\pm</math>SD)</b> | <b>CBD admin mg/24h</b> | <b>CBD <math>\mu</math>g/L Mean (<math>\pm</math>SD)</b> |
|------------------------------------------|-------------------------|----------------------------------------------------------|----------------------------------------------------------------|---------------------------------------------------------------|-------------------------|----------------------------------------------------------|
| <b>2/2</b>                               | <b>0</b>                | Not detectable                                           | Not detectable                                                 | Not detectable                                                | <b>0</b>                | Not detectable                                           |
| <b>3/5</b><br>of which<br>1/ 2 extra CBD | <b>9.6</b>              | 1 ( $\pm$ 0.0)                                           | 1 ( $\pm$ 0.0)                                                 | 22.6 ( $\pm$ 7.4)                                             | <b>19.2</b>             | 1 ( $\pm$ 0.0)<br>14.9( $\pm$ 8.7) with extra CBD        |
| <b>3/4</b>                               | <b>12</b>               | 1.1 ( $\pm$ 0.1)                                         | 1.2 ( $\pm$ 0.2)                                               | 32.2 ( $\pm$ 10.6)                                            | <b>24</b>               | 2.2 ( $\pm$ 1.0)                                         |
| <b>1/2</b>                               | <b>13.2</b>             | 1.4 ( $\pm$ 0.6)                                         | 1.4 ( $\pm$ 0.5)                                               | 62.5 ( $\pm$ 13.4)                                            | <b>26.4</b>             | 1.9 ( $\pm$ 1.3)                                         |
| <b>8/9</b>                               | <b>14.4</b>             | 1.8( $\pm$ 1.1)                                          | 2.8( $\pm$ 2.7)                                                | 74.4 ( $\pm$ 19.2)                                            | <b>28.8</b>             | 2.9 ( $\pm$ 1.3)                                         |
| <b>4/5</b>                               | <b>15.6</b>             | 1 ( $\pm$ 0.0)                                           | 1.6 ( $\pm$ 0.3)                                               | 48.0 ( $\pm$ 33.2)                                            | <b>31.2</b>             | 2.1 ( $\pm$ 0.8)                                         |
| <b>1/1</b>                               | <b>16.8</b>             | 1                                                        | 1.6                                                            | 86.0                                                          | <b>33.6</b>             | 2.8                                                      |
| <b>1/2</b>                               | <b>18</b>               | 2.9 ( $\pm$ 2.1)                                         | 2.6 ( $\pm$ 1.6)                                               | 61.0 ( $\pm$ 35.4)                                            | <b>36</b>               | 3.8 ( $\pm$ 3.5)                                         |
| <b>1/1</b>                               | <b>19.2</b>             | 1                                                        | 1.6                                                            | 84.0                                                          | <b>38.4</b>             | 3.5                                                      |

- Values of 3 samples were excluded since the THC/CBD treatment was administered 1 hour before blood sampling by mistake
- Values of 1 sample (THC 8.4mg/24H – CBD 16.8 mg/24 hours) were missing.
- Values for 1 patient were collected only at first sampling
- At both samplings, 1 patient took extra CBD as a co-medication for treating epilepsy on physician prescription.
- Values equal or inferior to 1 were calculated as 1 for statistical purposes.  
 THC, 11-OH-THC and CBD: **LOD:** 0.5 $\mu$ g/L; **LLOQ:** 1.0  $\mu$ g/L  
 THC-COOH: **LOD:** 1.0 $\mu$ g/L; **LLOQ:** 2.5  $\mu$ g/L  
 LOD = limit of detection; LLOQ =lower limit of quantitation

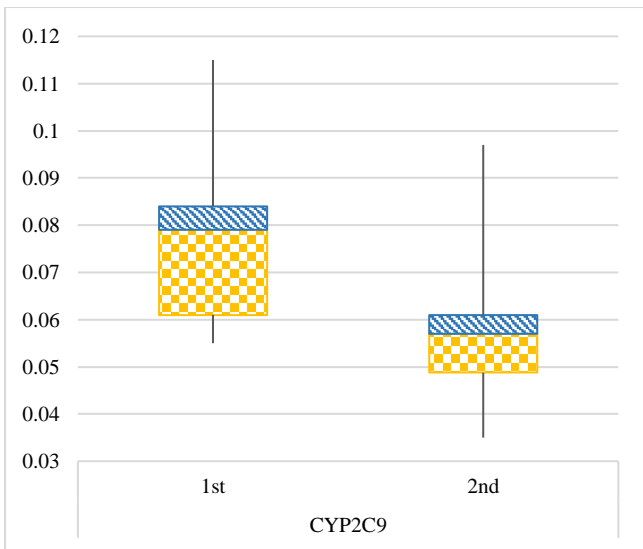

Figure B.1

CYP2C9 enzymatic activity.

Box Plot representing the metabolic ratios at 1<sup>st</sup> and 2<sup>nd</sup> blood sampling.

Geneva cocktail reference values: PM (poor metabolizer) <0.03; EM (normal metabolizer) >0.4; UM (ultra metabolizer) >1.3

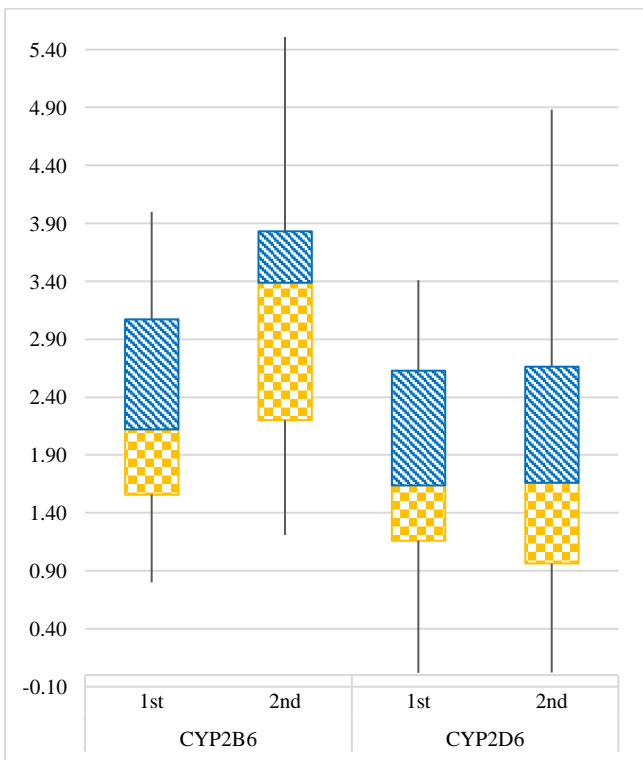

Figure B.2: CYP2B6, CYP2D6 enzymatic activities.

Box Plot representing the metabolic ratios at 1<sup>st</sup> and 2<sup>nd</sup> blood sampling.

Geneva cocktail reference values (-SD to +SD): CYP2B6= PM (poor metabolizer) 0.062-0.13; EM (normal metabolizer) 0.81-2.97; UM (ultra metabolizer) 4.9-12.7. CYP2D6= PM (poor metabolizer) 0.03-0.07; EM (normal metabolizer) 0.62
